# Supplementary material
Source: ML conference proceedings conference paper supplement (https://proceedings.neurips.cc/paper_files/paper/2015/hash/4921f95baf824205e1b13f22d60357a1-Abstract.html)
Supplement: Supplementary file [file 4921f95baf824205e1b13f22d60357a1-Supplemental.zip]

---

# Supplementary Material

---

**Purnamrita Sarkar**  
 Department of Statistics  
 University of Texas at Austin  
 purnamritas@austin.utexas.edu

**Deepayan Chakrabarti**  
 IROM, McCombs School of Business  
 University of Texas at Austin  
 deepay@utexas.edu

**Peter Bickel**  
 Department of Statistics  
 University of California, Berkeley  
 bickel@stat.berkeley.edu

**Theorem 4.1** (Algorithm 1 solves Problem 2 in semi-dense graphs). *Let  $t_n = n(\pi(\alpha + \gamma)^2/2 + (1 - 2\pi)\gamma^2)$ . Let  $S$  be the set of nodes returned by  $\text{SCAN}(A_1, q, t_n)$ . Let  $n_w$  ( $n_o$ ) denote the number of nodes in  $S \cap C_1$  ( $S \setminus C_1$ ). If the graph is semi-dense, and  $\frac{\alpha - \gamma}{\alpha} \geq \frac{2}{\sqrt{\pi}} \left( \frac{\log n}{n\alpha^2} \right)^{1/4}$ , then  $P(n_w = n\pi) \rightarrow 1$  and  $P(n_o = 0) \rightarrow 1$ .*

*Proof.* Let  $d_{qa} = \sum_{i \in C_a} A_1(q, i)$  be the number of links from the query node  $q$  to nodes in cluster  $C_a$ . Let  $\mathbf{d}_q = \{d_{q1}, \dots, d_{qK}\}$  and  $d = \sum_a d_{qa}$ .

Let  $\psi_n = \sqrt{(6 \log n)/(n\pi\gamma)}$ . By a Chernoff bound, we can show that

$$P(|d_{q1} - n\pi\alpha| \leq n\pi\alpha\psi_n) \leq 2/n^2 \quad (1)$$

$$P(|d_{qa} - n\pi\gamma| \leq n\pi\gamma\psi_n) \leq 2/n^2 \quad \forall a \neq 1 \quad (2)$$

$$\Rightarrow P(\mathbf{d}_q \in \text{GOOD}) \triangleq P \left( \begin{array}{l} d_{q1} \in n\pi\alpha(1 \pm \psi_n) \\ d_{qa} \in n\pi\gamma(1 \pm \psi_n) \quad \forall a \neq 1 \end{array} \right) \geq 1 - \frac{K}{n^2}, \quad (3)$$

where the GOOD set is defined via the last inequality. Note that

$$\psi_n = \sqrt{\Theta(\log n/(n\rho))} = \sqrt{\sqrt{\log n/n} \cdot \Theta(\sqrt{\log n/(n\rho^2)})} \rightarrow 0. \quad (4)$$

Conditioned on  $\mathbf{d}_q$ ,  $X_i$  is the sum of  $K$  Binomial( $d_{qa}, B_{1a}$ ) independent random variables representing the number of common neighbors between  $q$  and  $i$  via nodes in each of the  $K$  clusters:

$$\hat{\eta}_a \triangleq E[X_i \mid \mathbf{d}_q, i \in C_a] = d_{qa}\alpha + (d - d_{qa})\gamma.$$

We have, for  $\mathbf{d}_q \in \text{GOOD}$ :

$$n(\pi\alpha^2 + (1 - \pi)\gamma^2)(1 - \psi_n) \leq \hat{\eta}_1 \leq n(\pi\alpha^2 + (1 - \pi)\gamma^2)(1 + \psi_n) \quad (5)$$

$$n(2\pi\alpha\gamma + (1 - 2\pi)\gamma^2)(1 - \psi_n) \leq \hat{\eta}_a \leq n(2\pi\alpha\gamma + (1 - 2\pi)\gamma^2)(1 + \psi_n) \quad \text{For } a \neq 1 \quad (6)$$

Let us denote by  $\ell_n \triangleq n(\pi\alpha^2 + (1 - \pi)\gamma^2)$  and  $u_n \triangleq n(2\pi\alpha\gamma + (1 - 2\pi)\gamma^2)$ , and also let  $t_n = (\ell_n + u_n)/2$ . Clearly,  $u_n \leq t_n \leq \ell_n$ , and  $\ell_n - u_n = n\pi(\alpha - \gamma)^2 \geq 4 \log n \sqrt{n\alpha^2/\log n} \rightarrow \infty$ , where we applied condition on  $(\alpha - \gamma)/\alpha$  noted in the theorem statement. Second, we can easily see that  $\hat{\eta}_a \leq \hat{\eta}_1 \leq n\alpha^2(1 + \psi_n)$  for large enough  $n$ .

Now, by a Chernoff bound,

$$\begin{aligned}
P(X_i \leq t_n \mid \mathbf{d}_q \in \text{GOOD}, i \in C_1) &= E[P(X_i \leq t_n \mid \mathbf{d}_q, \mathbf{d}_q \in \text{GOOD}, i \in C_1) \mid \mathbf{d}_q \in \text{GOOD}] \\
&\leq E \left[ \exp \left( -\frac{(\hat{\eta}_1 - t_n)^2}{3\hat{\eta}_1} \right) \mid \mathbf{d}_q \in \text{GOOD} \right] \\
&\leq \exp \left( -\frac{(\ell_n - t_n - \ell_n \psi_n)^2}{3n\alpha^2(1 + \psi_n)} \right) \\
&= \exp \left( -\frac{\left( \frac{\ell_n - u_n}{2} \right)^2 \left( 1 - \frac{2\ell_n \psi_n}{\ell_n - u_n} \right)^2}{3n\alpha^2(1 + \psi_n)} \right) \\
&\leq \exp \left( -\frac{(\ell_n - u_n)^2}{12n\alpha^2} \left( 1 - O \left( \frac{\ell_n \psi_n}{\ell_n - u_n} \right) - O(\psi_n) \right) \right)
\end{aligned} \tag{7}$$

Now,

$$\begin{aligned}
\frac{(\ell_n - u_n)^2}{12n\alpha^2} &= \frac{n^2\pi^2(\alpha - \gamma)^4}{12n\alpha^2} \geq 4/3 \log n \\
\frac{\ell_n \psi_n}{\ell_n - u_n} &= \Theta \left( \frac{n\rho^2}{n\pi(\alpha - \gamma)^2} \sqrt{\frac{\log n}{n\rho}} \right) \leq \Theta \left( \frac{n\rho^2}{\sqrt{n\rho^2 \log n}} \sqrt{\frac{\log n}{n\rho}} \right) = \Theta(\sqrt{\rho}) \rightarrow 0 \\
\psi_n &\rightarrow 0, \quad (\text{Eq. 2})
\end{aligned}$$

where we used the condition on  $(\alpha - \gamma)/\alpha$ , and the fact that  $\alpha = \Theta(\rho)$  and  $\gamma = \Theta(\rho)$ . Using this in Eq. 7 yields

$$P(X_i \leq t_n \mid \mathbf{d}_q \in \text{GOOD}, i \in C_1) \leq n^{-4/3+o(1)}.$$

By a similar argument, we find that

$$P(X_i \geq t_n \mid \mathbf{d}_q \in \text{GOOD}, i \in C_a, a \neq 1) \leq n^{-4/3+o(1)}.$$

We want to point out that while it seems that we need  $\rho \rightarrow 0$  for our analysis, that is not the case. In order to analyze the case where  $\rho = \Theta(1)$ , we would simply need an updated separation condition:

$$(\ell_n - u_n) \geq \max(4\sqrt{n\alpha^2 \log n}, C\psi_n \ell_n)$$

.

When  $\rho \rightarrow 0$ , the first term is larger. This again requires an updated separation between  $\alpha$  and  $\gamma$ , namely

$$(\alpha - \gamma)/\alpha \geq \max \left( \frac{2}{\sqrt{\pi}} \left( \frac{\log n}{n\alpha^2} \right)^{1/4}, \frac{C}{\pi^{3/4}} \left( \frac{\log n}{n} \right)^{1/4} \right),$$

for some large enough constant  $C$ . However for ease of exposition we only present the  $\rho \rightarrow 0$  case in the main paper.

Let  $Y_i := \mathbf{1}\{X_i \geq t_n\}$ .  $\text{SCAN}(A_1, q, t_n)$  returns exactly the nodes  $S = \{i \mid Y_i = 1\}$ . We have:

$$n_w = \sum_{i \in C_1} Y_i \quad n_o = \sum_{i \notin C_1} Y_i \tag{8}$$

Conditioned on  $\mathbf{d}_q$ , both  $n_w$  and  $n_o$  are sums of conditionally independent and identically distributed Bernoullis.

$$\begin{aligned}
P(n_w = n\pi) &\geq P(\mathbf{d}_q \in \text{GOOD}) \cdot P(n_w = n\pi \mid \mathbf{d}_q \in \text{GOOD}) \\
&\geq P(\mathbf{d}_q \in \text{GOOD}) \cdot (1 - P(\exists i \in C_1, X_i < t_n \mid \mathbf{d}_q \in \text{GOOD})) \\
&\geq \left(1 - \frac{K}{n^2}\right) \cdot (1 - n\pi \cdot n^{-4/3}) \\
&\geq 1 - \Theta(n^{-1/3}) \\
&\rightarrow 1 \\
P(n_o = 0) &\geq P(\mathbf{d}_q \in \text{GOOD}) \cdot P(n_o = 0 \mid \mathbf{d}_q \in \text{GOOD}) \\
&\geq P(\mathbf{d}_q \in \text{GOOD}) \cdot (1 - P(\exists i \notin C_1, X_i \geq t_n \mid \mathbf{d}_q \in \text{GOOD})) \\
&\geq \left(1 - \frac{K}{n^2}\right) \cdot (1 - n(1 - \pi) \cdot n^{-4/3}) \\
&\geq 1 - \Theta(n^{-1/3}) \\
&\rightarrow 1
\end{aligned}$$

□

**Theorem 4.2** (Algorithm 1 followed by Algorithm 2 solves Problem 2 in semi-sparse graphs). *Let  $t_n = 1$  and  $s_n = n^2(\pi\alpha + (1 - \pi)\gamma)^2(\alpha + \gamma)/2$ . Let  $S = \text{SCAN}(A_1, q, t_n)$  and  $S_1 = \text{CLEAN}(S, A_2, q, s_n)$ . Let  $n_w^{(c)}(n_o^{(c)})$  denote the number of nodes in  $S_1 \cap C_1$  ( $S_1 \setminus C_1$ ). If the graph is semi-sparse, and  $\pi\alpha \geq 3(1 - \pi)\gamma$ , then  $P(n_w^{(c)} = n\pi) \rightarrow 1$  and  $P(n_o^{(c)} = 0) \rightarrow 1$ .*

*Proof.* The degrees of nodes can still be bound w.h.p. via Eq. 1 since in the semi-sparse case

$$\psi_n = \sqrt{\Theta(\log n / (n\rho))} = \sqrt{\frac{1}{n^{1/3}} \cdot \frac{\log n}{n^{2/3}\rho}} \rightarrow 0.$$

Similarly, the equations for the  $E[X_i \mid \mathbf{d}_q \in \text{GOOD}]$  hold as well (Eqs. 5 and 6). We can also bound the variances of  $X_i$  (which are sums of conditionally independent Bernoullis):

$$\begin{aligned}
\text{var}[X_i \mid \mathbf{d}_q, i \in C_1] &= d_{q1}\alpha(1 - \alpha) + (d - d_{q1})\gamma(1 - \gamma) \\
&\leq E[X_i \mid \mathbf{d}_q, i \in C_1] \triangleq \hat{\eta}_1
\end{aligned}
\quad \text{Since } \gamma < \alpha < 1$$

These highlight two major differences between the semi-sparse and semi-dense cases. First, in the semi-sparse case, both expectations  $\hat{\eta}_1$  and  $\hat{\eta}_a$  (for  $\mathbf{d}_q \in \text{GOOD}$ ) are of the order  $O(n\rho^2)$  which tends to zero. Second, standard deviations on the number of common neighbors are of a larger order than expectations. Together, this means that the number of common neighbors to within-cluster and outside-cluster nodes can no longer be separated; hence, Algorithm 1 by itself cannot work.

In spite of this, there are small differences between nodes within and outside the query cluster, which can be exploited. First, by an application of the Paley-Zygmund inequality, we find a lower bound as:

$$\begin{aligned}
p_a &\triangleq P(X_i \geq 1 \mid \mathbf{d}_q, i \in C_a) \\
&\geq \frac{E[X_i \mid \mathbf{d}_q, i \in C_a]^2}{\text{var}(X_i \mid \mathbf{d}_q, i \in C_a) + E[X_i \mid \mathbf{d}_q, i \in C_a]^2} \\
&\geq \frac{\hat{\eta}_a^2}{\hat{\eta}_a + \hat{\eta}_a^2} \geq \hat{\eta}_a(1 - \hat{\eta}_a)
\end{aligned}$$

On the other hand Markov's inequality can be used to upper bound this quantity:

$$p_a \leq E(X_i \mid \mathbf{d}_q, i \in C_a) = \hat{\eta}_a$$

Hence for  $a = 1$  vs  $a \neq 1$ , using Equations 5 and 6 we have:

For  $\mathbf{d}_q \in \text{GOOD}$

$$\ell_n(1 - \xi_n) \leq \hat{\eta}_1(1 - \hat{\eta}_1) \leq p_1 \leq \hat{\eta}_1 \leq \ell_n(1 + \psi_n) \quad (9)$$

$$u_n(1 - \xi'_n) \leq \hat{\eta}_a(1 - \hat{\eta}_a) \leq p_a \leq \hat{\eta}_a \leq u_n(1 + \psi_n) \quad (10)$$

where  $\xi_n \triangleq \psi_n + \ell_n + 2\psi_n\ell_n + \ell_n\psi_n^2$  and  $\xi'_n \triangleq \psi_n + u_n + 2\psi_nu_n + u_n\psi_n^2$ .

Note that even though  $p_a \rightarrow 0$  in probability, w.h.p. (when  $\mathbf{d}_q \in \text{GOOD}$ )  $n\pi p_a \rightarrow \infty$  faster than  $\log n$ . So we can use concentration inequalities like the Chernoff bound again to bound  $n_w$  and  $n_o$ .

$$P(n\pi p_1(1 - \phi_n) \leq n_w \leq n\pi p_1(1 + \phi_n) \mid \mathbf{d}_q) \geq 1 - 2n^{-2} \quad (11)$$

Similarly,

$$P(n(1 - \pi)p_a(1 - \delta_n) \leq n_o \leq n(1 - \pi)p_a(1 + \delta_n) \mid \mathbf{d}_q) \geq 1 - 2n^{-2} \quad (12)$$

$$(13)$$

Since  $\delta_n \triangleq \sqrt{6 \log n / n(1 - \pi)p_a}$  and  $\phi_n \triangleq \sqrt{6 \log n / n\pi p_1}$  are  $O(\sqrt{\log n / n^2 \rho^2})$ , they are  $o(1)$  for  $\mathbf{d}_q \in \text{GOOD}$ .

Note that unlike the denser regime,  $n_w$  and  $n_o$  can be of the same order here. And so the candidate set  $S$  returned by thresholding the common neighbors has a non-vanishing fraction of nodes from outside  $q$ 's community. However, this fraction is relatively small, which is what we would exploit in the cleaning step.

We will heavily use the fact that  $A_2$  is an independent copy of  $A$  and so the number of edges to the set  $S$  obtained by thresholding common neighbors from  $A$ , are still pairwise independent. The expectation of the number of edges from a node to  $S$  is given by:

$$\theta_w \triangleq E\left[\sum_{j \in S} A_2(i, j) \mid i \in C_1, \mathbf{d}_q\right] = n_w \alpha + n_o \gamma \quad (14)$$

$$\theta_o \triangleq E\left[\sum_{j \in S} A_2(i, j) \mid i \notin C_1, \mathbf{d}_q\right] = n_w \gamma + n_o \alpha \quad (15)$$

Now we will bound the probability of mistakes in the cleaning step. We set the degree threshold  $s_n = n(\alpha + \gamma)(\pi\alpha + (1 - \pi)\gamma)^2/2$ .

Using Equations 10 we have with probability at least  $1 - 2/n^2$ ,

$$\begin{aligned} \theta_w &= n_w \alpha + n_o \gamma \geq n\pi p_1 \alpha(1 - \phi_n) + n(1 - \pi)p_a \gamma(1 - \delta_n) \\ &\geq n\pi \ell_n \alpha(1 - \xi_n)(1 - \phi_n) + n(1 - \pi)u_n \gamma(1 - \xi'_n)(1 - \delta_n) \\ &= (n\pi \ell_n \alpha + n(1 - \pi)u_n \gamma) + w_n \end{aligned}$$

where  $w_n$  is the remainder term, whose magnitude is  $o(n^2 \rho^3)$ , since  $\xi_n, \phi_n = o(1)$ , when  $\mathbf{d}_q \in \text{GOOD}$ . Thus we have:

For  $\mathbf{d}_q \in \text{GOOD}$

$$\begin{aligned} \theta_w - s_n &\geq (n\pi \ell_n \alpha + n(1 - \pi)u_n \gamma) + w_n - s_n \\ &\geq (n\pi \ell_n - n(1 - \pi)u_n)(\alpha - \gamma)/2 + w_n \\ &= n^2(\alpha - \gamma)((\pi\alpha + (1 - \pi)\gamma)(\pi\alpha - (1 - \pi)\gamma) - 2\pi(1 - \pi)\gamma(\alpha - \gamma))/2 + w_n \\ &= n^2(\alpha - \gamma)(1 - \pi)\gamma^2 + w_n = n^2(\alpha - \gamma)(1 - \pi)\gamma^2(1 + o(1)) \\ &\geq 4\sqrt{\theta_w \log n} \quad \text{For large enough } n \end{aligned}$$

The last step uses the definition of  $\ell_n$  and  $u_n$ , the separation condition between  $\alpha$  and  $\gamma$  and an algebraic simplification. We also use the fact that for  $\mathbf{d}_q \in \text{GOOD}$ ,  $\theta_w \leq n\pi p_1(1 + o(1)) \leq n^2 \pi \alpha^3(1 + o(1))$  w.h.p.

A similar argument holds for  $s_n - \theta_o$  as well; in fact,  $s_n$  was chosen to be the midpoint of the lower bound of  $\theta_w$  and the upper bound of  $\theta_o$ .

Now, the probability of a node from  $C_1$  having number of edges to  $S$  below the threshold is given by:

$$\begin{aligned}
P(\exists i \in C_1, \sum_{j \in S} A_2(i, j) \leq s_n \mid \mathbf{d}_q \in \text{GOOD}) &\leq nP(\sum_{j \in S} A_2(i, j) \geq s_n; i \in C_1 \mid \mathbf{d}_q \in \text{GOOD}) \\
&\leq nE \left[ P \left( \sum_{j \in S} A_2(i, j) \geq s_n; i \in C_1 \mid \mathbf{d}_q \right) \mid \mathbf{d}_q \in \text{GOOD} \right] + c/n^2 \\
&\leq nE [\exp(-(\theta_w - s_n)^2/3\theta_w) \mid \mathbf{d}_q \in \text{GOOD}] + c/n^2 \leq n^{-1/3} + cn^{-2} \rightarrow 0
\end{aligned}$$

The  $c/n^2$  term comes from the error probabilities in Equations 11 and 12. Similarly the probability of a node from outside  $C_1$  having number of edges to  $S$  above the threshold  $s_n$  can be upper bounded by:

$$\begin{aligned}
P(\exists i \notin C_1, \sum_{j \in S} A_2(i, j) \geq s_n \mid \mathbf{d}_q \in \text{GOOD}) &\leq nP(\sum_{j \in S} A_2(i, j) \geq s_n; i \notin C_1 \mid \mathbf{d}_q \in \text{GOOD}) \\
&\leq nE[\exp(-(\theta_o - s_n)^2/3\theta_o) \mid \mathbf{d}_q \in \text{GOOD}] + c/n^2 \leq n^{-1/3} \rightarrow 0
\end{aligned}$$

These two error probabilities and argument identical to the proof of theorem 4.1 establish that  $P(S_1 = C_1) \rightarrow 0$  under semi-sparse regime.

□
